# Supplementary material for: Evidence of link between quorum sensing and sugar metabolism in Escherichia coli revealed via cocrystal structures of LsrK and HPr
Source: PubMed Central journal article supplement — Sci Adv. 2018 Jun 1;4(6):eaar7063. doi: 10.1126/sciadv.aar7063 (PMC5983913; doi:10.1126/sciadv.aar7063), 2018-06-01
Supplement: aar7063_SM.pdf [file aar7063_SM.pdf]

## Supplementary Materials for

### **Evidence of link between quorum sensing and sugar metabolism in *Escherichia coli* revealed via cocrystal structures of LsrK and HPr**

Jung-Hye Ha, Pricila Hauk, Kun Cho, Yumi Eo, Xiaochu Ma, Kristina Stephens, Soyoung Cha, Migyeong Jeong, Jeong-Yong Suh, Herman O. Sintim, William E. Bentley, Kyoung-Seok Ryu

Published 1 June 2018, *Sci. Adv.* **4**, eaar7063 (2018)  
DOI: 10.1126/sciadv.aar7063

#### **This PDF file includes:**

- fig. S1. Identification of copurified protein with LsrK.
- fig. S2. SEC-MALS analysis of the purified LsrK/HPr protein complex.
- fig. S3. Electron density maps in the region of the bound HPr, ATP, and ADP.
- fig. S4. Monitoring the stability of the synthesized p-<sup>15</sup>NHPr using HSQC experiment.
- table S1. X-ray data collection and refinement statistics.
- table S2. Strains and plasmids used for Miller assay.
- table S3. Primer sequences for the in vivo studies of the wild-type and mutant HPr proteins.

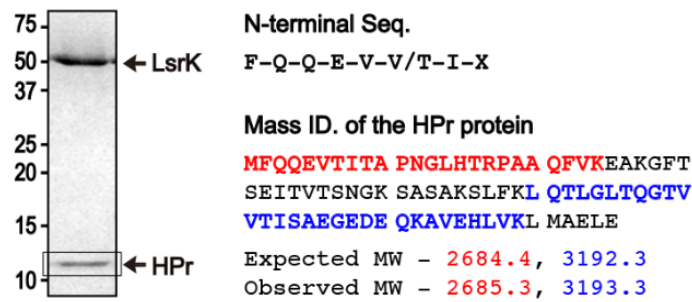

**fig. S1. Identification of copurified protein with LsrK.** SDS-PAGE analysis of LsrK protein crystal shows the presence of an additional protein band (boxed region in left panel). (i) N-terminal sequencing using Edman degradation and (ii) mass identification after in-gel trypsin-digestion validated that the copurified protein with the LsrK was *E. coli* HPr protein.

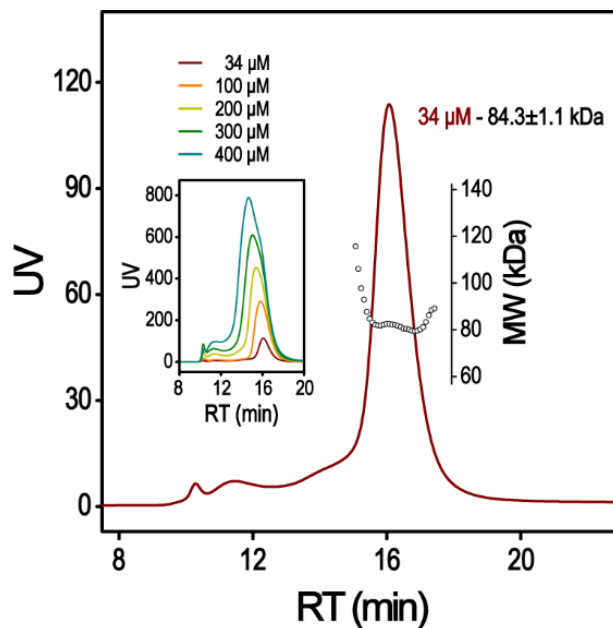

**fig. S2. SEC-MALS analysis of the purified LsrK/HPr protein complex.** The LsrK/HPr protein complex forms a dimer at elevated concentration. However, the LsrK/HPr protein exists as a monomeric one-to-one complex at low concentrations that are biologically more realistic. SEC-MALS analysis of samples at lower concentration of (1 mg/ml, 14.7  $\mu$ M) yielded MW (63.9 $\pm$ 1.9 kDa) that is more close to the MW of the 'monomeric' LsrK/HPr complex (not shown).

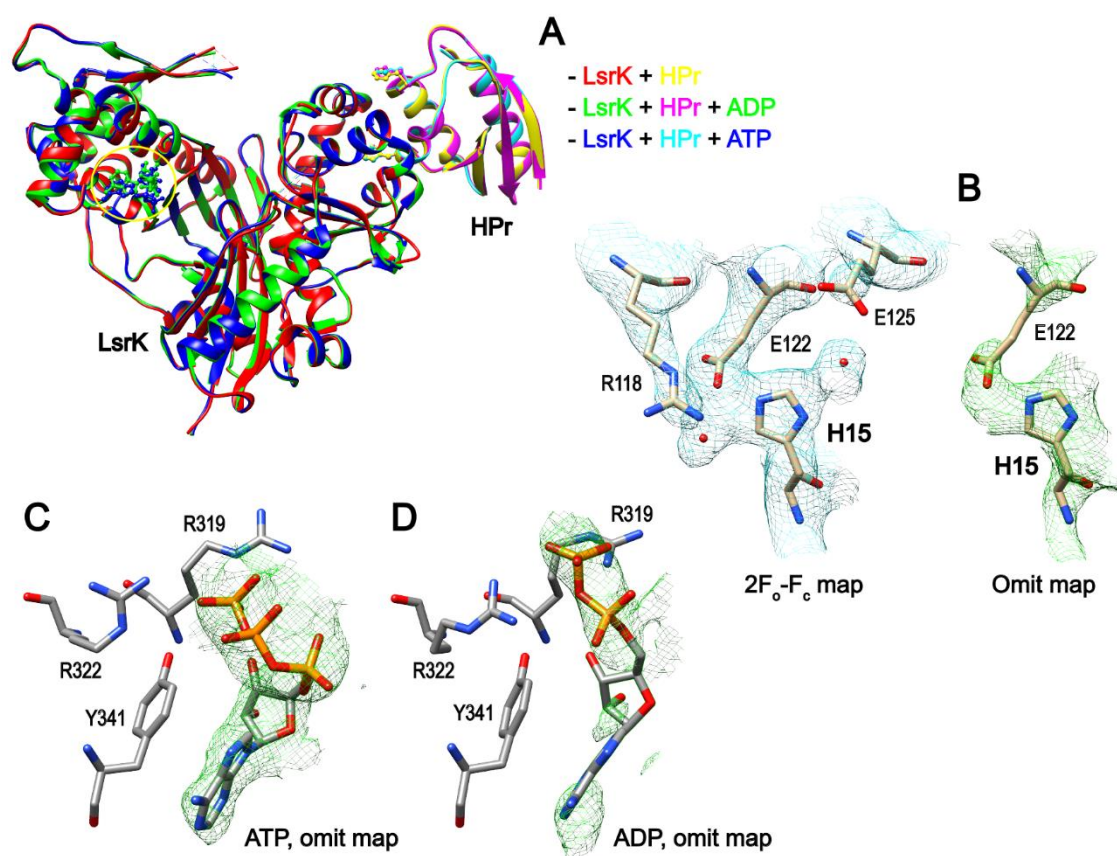

**fig. S3. Electron density maps in the region of the bound HPr, ATP, and ADP.** (A) The structural overlay of the <sup>His</sup>LsrK/HPr, <sup>His</sup>LsrK/HPr/ADP, and <sup>His</sup>LsrK/HPr/ATP proteins shows that their overall structures are almost identical. (B) The 2F<sub>o</sub>-F<sub>c</sub> map of the <sup>His</sup>LsrK/HPr/ATP complex contoured at 1.0σ (left panel) is shown for the region of the HPr-H15 residue. The simulated annealing (SA) omit map (0.5σ) was calculated for the HPr-H15 and LsrK-E122 residues (right panel). The less clear map in the region of the HPr-H15 and LsrK-E122 shows that the H15 residue likely has motional flexibility. The SA omit maps (0.5σ) show that the occupancy of the ADP molecule in the <sup>His</sup>LsrK/HPr/ADP complex (D) was much less than that of the ATP in the <sup>His</sup>LsrK/HPr/ATP complex (C).

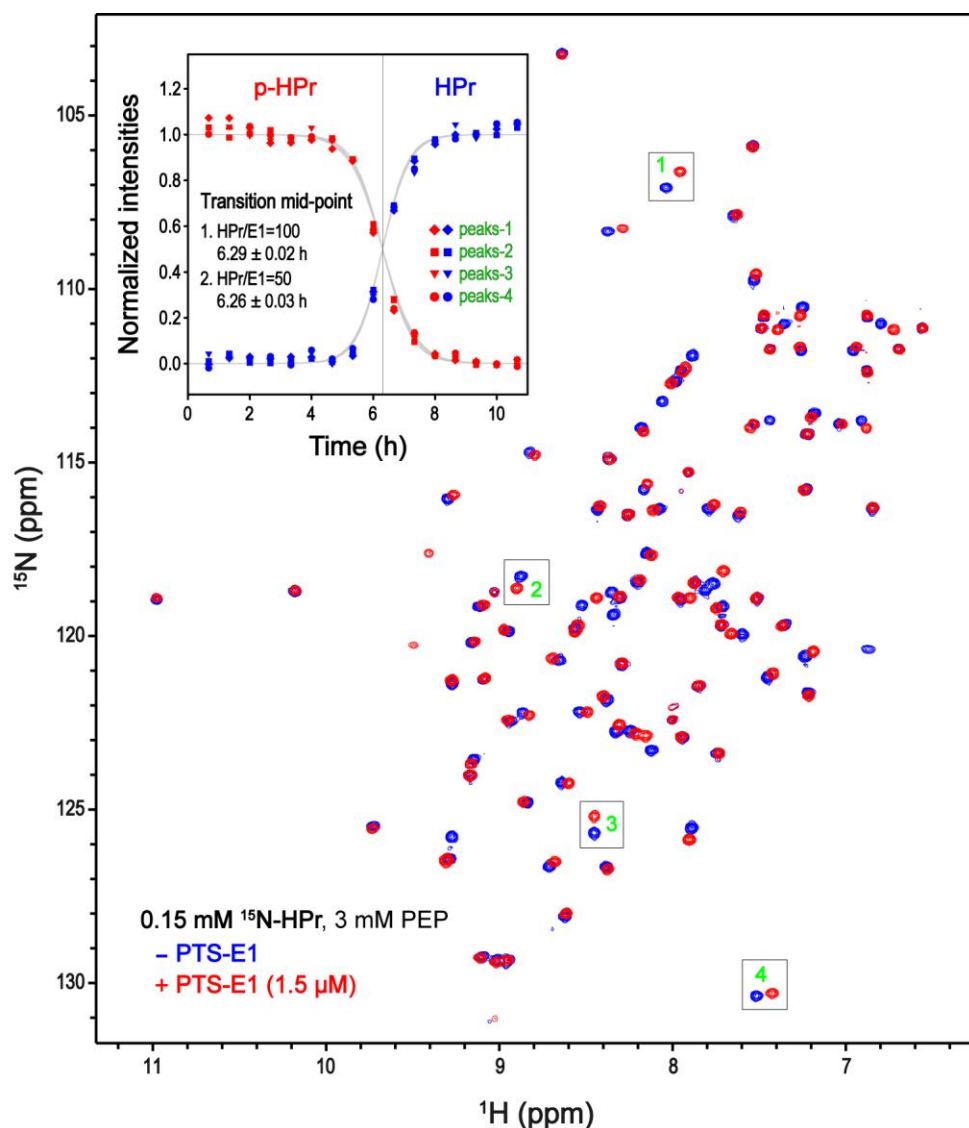

**fig. S4. Monitoring the stability of the synthesized p-<sup>15</sup>N HPr using HSQC experiment.** The incubation of the <sup>15</sup>N HPr (0.15 mM) with the EI (1.5 μM) in the presence of 3.0 mM PEP resulted in the complete phosphorylation of the <sup>15</sup>N HPr. The one-fourth amount of the EI was also sufficient for the complete phosphorylation (now shown). The synthesized p-HPr was maintained up to 5 h after the initiation of the EI reaction (inset). The presence of twice amount of the EI in the reaction mixture did not notably decrease the life-time of the p-<sup>15</sup>N HPr, which indicated that non-productive consumption of PEP by the EI was negligible and the life-time was mainly dependent on the initial concentration of PEP.

**table S1. X-ray data collection and refinement statistics.**

|                                            | HisLsrK/HPr SeMet                      | HisLsrK/HPr                            | HisLsrK/HPr/ADP                        | HisLsrK/HPr/ATP                        |
|--------------------------------------------|----------------------------------------|----------------------------------------|----------------------------------------|----------------------------------------|
| Resolution (Å)                             | 50.0-3.2 (3.31-3.20)                   | 50.0-3.0 (3.11-3.00)                   | 50.0-2.7 (2.80-2.70)                   | 50.0-2.9 (2.80-2.70)                   |
| Space group                                | P3 <sub>2</sub> 21                     | P3 <sub>2</sub> 21                     | P3 <sub>2</sub> 21                     | P3 <sub>2</sub> 21                     |
| Unit-cell parameters<br>(a, b, c, α, β, γ) | 101.26, 101.26,<br>344.76, 90, 90, 120 | 101.16, 103.34,<br>344.32, 90, 90, 120 | 101.25, 101.25,<br>344.15, 90, 90, 120 | 101.02, 101.02,<br>344.45, 90, 90, 120 |
| Measured reflections                       | 198,323                                | 405,478                                | 387,461                                | 451,089                                |
| Unique reflections (#)                     | 34,461                                 | 41,484                                 | 55,517                                 | 55,279                                 |
| Number of molecules in AU                  | 2                                      | 2                                      | 2                                      | 2                                      |
| Redundancy                                 | 5.8 (4.5)                              | 9.8 (6.1)                              | 7.0 (3.5)                              | 8.2 (4.2)                              |
| R <sub>merge</sub> (%)                     | 9.1 (37.1)                             | 6.2 (39.7)                             | 5.8 (37.8)                             | 6.2 (37.6)                             |
| Mean I/Iσ                                  | 26.0 (3.5)                             | 22.2 (2.0)                             | 25.9 (2.6)                             | 25.2 (3.0)                             |
| Completeness (%)                           | 98.5 (98.3)                            | 98.3 (96.8)                            | 96.9 (94.4)                            | 96.7 (94.3)                            |
|                                            |                                        |                                        |                                        |                                        |
| R <sub>cryst</sub> /R <sub>free</sub>      |                                        | 0.199/0.239                            | 0.214/0.255                            | 0.215/0.231                            |
| RMSD bond length (Å)                       |                                        | 0.005                                  | 0.005                                  | 0.004                                  |
| RMSD bond angle (°)                        |                                        | 0.973                                  | 0.978                                  | 0.841                                  |
| Ramachandran plot                          |                                        |                                        |                                        |                                        |
| Favored (%)                                |                                        | 90.0                                   | 95.8                                   | 96.5                                   |
| Outliers (%)                               |                                        | 0.18                                   | 0.18                                   | 0.18                                   |
| Poor rotamers                              |                                        | 0.7                                    | 0.8                                    | 0.8                                    |
| Molprobtity overall score                  |                                        | 1.68                                   | 1.69                                   | 1.45                                   |
| Average B factor (Å <sup>2</sup> )         |                                        |                                        |                                        |                                        |
| Chain A                                    |                                        | 31.92                                  | 25.58                                  | 41.52                                  |
| Chain B                                    |                                        | 31.53                                  | 24.18                                  | 40.37                                  |
| Chain C                                    |                                        |                                        |                                        |                                        |
| Chain D                                    |                                        |                                        |                                        |                                        |
| Water                                      |                                        | 39.29                                  | 32.24                                  | 42.07                                  |
| Ligand                                     |                                        | -                                      | 28.06                                  | 41.11                                  |
| PDB deposit                                |                                        | 5YA0                                   | 5YA1                                   | 5YA2                                   |

**table S2. Strains and plasmids used for Miller assay.**

| Strain or plasmid             | Relevant genotype and property                                                            | Source or reference |
|-------------------------------|-------------------------------------------------------------------------------------------|---------------------|
| <b><i>E. coli</i> strains</b> |                                                                                           |                     |
| DH5 $\alpha$                  | Used for cloning                                                                          | New England labs    |
| ZK126                         | W3110 $\Delta lacU169 tna-2$                                                              | (45)                |
| LW7                           | W3110 $\Delta lacU169 tna-2 \Delta luxS::Kan$                                             | (10)                |
| PH01                          | W3110 $\Delta lacU169 tna-2 \Delta ptsH::Cm$                                              | This study          |
| PH02                          | W3110 $\Delta lacU169 tna-2 \Delta luxS::Kan \Delta ptsH::Cm$                             | This study          |
| <b>Plasmids</b>               |                                                                                           |                     |
| pSkunk                        | p15a origin, fl origin, AadA streptomycin/spectomycin resistance, and <i>tac</i> promoter | (47)                |
| pLW11                         | pFZY1 derivative, containing <i>lsrACDBFG</i> promoter region, Ap <sup>r</sup>            | (10)                |

**table S3. Primer sequences for the in vivo studies of the wild-type and mutant HPr proteins.**

|                                                                                                          |
|----------------------------------------------------------------------------------------------------------|
| <b>Knock-out primers</b>                                                                                 |
| <b><i>ptsHdel-F</i></b><br>ACCGCCAGGCTAGACTTTAGTTCCACAACACTAAACCTATAAGTTGGGGAAATACAgtagtaggctggagctgcttc |
| <b><i>ptsHdel-R</i></b><br>GCCTGAAATCATAACCCTACCTTACTTGTGACTGATTTTAAAAAGAACCCGGGAAAcatatgaatatcctccttag  |
| <b><i>ptsHout-F</i></b><br>GATGCGCGAAATTAATCGTTACAGGAAAAGCC                                              |
| <b><i>ptsHout-R</i></b><br>CTCCTCATCTTCGAGCAGCATAATATGCCCTTC                                             |
| <b>Cloning primers</b>                                                                                   |
| <b><i>ptsH-BamHI</i></b><br>tacgcgga <b>ttcc</b> ATGTTCCAGCAAGAAGTTACCATTACCGCTCC                        |
| <b><i>ptsH-SpeI</i></b><br>agtctag <b>actagt</b> TTACTCGAGTCCGCCATCAGTTTAACCG                            |
